# Supplementary material for: Essential Oil of Ipomoea carnea: Chemical Profile, Chemometric Analysis, Free Radical Scavenging, and Antibacterial Activities
Source: MDPI journal article supplement (doi:10.3390/su14159504), 2022-08-03
Supplement: s1 [file s1]

Article

# Essential Oil of *Ipomoea carnea*: Chemical Profile, Chemometric Analysis, Free Radical Scavenging, and Antibacterial Activities

Ahmed M. Abd-ElGawad <sup>1,\*</sup>, Abdelsamed I. Elshamy <sup>2,\*</sup>, Abdallah M. Elgorban <sup>3</sup>, Emad M. Hassan <sup>4</sup>, Nouf S. Zaghloul <sup>5</sup>, Salman F. Alamery <sup>6</sup>, Abd El-Nasser G. El Gendy <sup>4</sup>, Khalid M. Elhindi <sup>1</sup> and Yasser A. El-Amier <sup>7</sup>

<sup>1</sup> Plant Production Department, College of Food & Agriculture Sciences, King Saud University, Riyadh 11451, Saudi Arabia; kelhindi@ksu.edu.sa

<sup>2</sup> Department of Natural Compounds Chemistry, National Research Centre, Giza 12622, Egypt;

<sup>3</sup> Department of Botany and Microbiology, College of Science, King Saud University, Riyadh 11451, Saudi Arabia; aelgorban@ksu.edu.sa

<sup>4</sup> Medicinal and Aromatic Plants Research Department, National Research Centre, Giza 12622, Egypt; emadnrc@yahoo.com (E.M.H.); aggundy\_5@yahoo.com (A.E.-N.G.E.G.)

<sup>5</sup> Bristol Centre for Functional Nanomaterials, HH Wills Physics Laboratory, Bristol, BS8 1FD, UK; nouf.zaghloul@bristol.ac.uk

<sup>6</sup> Biochemistry Department, College of Science, King Saud University, Riyadh 11451, Saudi Arabia; salamery@ksu.edu.sa

<sup>7</sup> Department of Botany, Faculty of Science, Mansoura University, Mansoura 35516, Egypt; yasran@mans.edu.eg

\*Correspondence: aibrahim2@ksu.edu.sa (A.M.A.-E.); elshamynrc@yahoo.com (A.I.E.)

**Citation:** Abd-ElGawad, A.M.; Elshamy, A.I.; Elgorban, A.M.; Hassan, E.M.; Zaghloul, N.S.; Alamery, S.F.; El Gendy, A.G.; Elhindi, K.M.; El-Amier, Y.A. Essential Oil of *Ipomoea Carnea*: Chemical Profile, Chemometric Analysis, Free Radical Scavenging, and Antibacterial Activities. *Sustainability* **2022**, *14*, 9504. <https://doi.org/10.3390/su14159504>

Academic Editor: Dario Donno

Received: 13 July 2022

Accepted: 1 August 2022

Published: 3 August 2022

**Publisher's Note:** MDPI stays neutral with regard to jurisdictional claims in published maps and institutional affiliations.

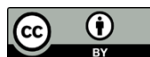

**Copyright:** © 2022 by the authors. Submitted for possible open access publication under the terms and conditions of the Creative Commons Attribution (CC BY) license (<https://creativecommons.org/licenses/by/4.0/>).

## Supplementary Materials

**Table S1.** A dataset of the major compounds (> 3%) of the present studied *Ipomea carnea* and 21 other reported *Ipomea* ecospecies.

| Compound                        | I.car(L)-EG | I.pes(FL)-MA | I.pes(DL)-MA | I.bat(L)-NG | I.obs(AP)-IN | I.aqu(AP)-P | I.asa(L)-BR | I.set(L)-BR | I.bat(L)-BR | I.bat(F)-BR | I.car(L)-BR | I.car(F)-BR | I.pes(L)-BR | I.pes(F)-BR | I.alb(L)-BR | I.alb(F)-BR | I.ind(L)-BR | I.ind(F)-BR | I.til(L)-BR | I.til(F)-BR | I.amn(L)-BR | I.amn(F)-BR |
|---------------------------------|-------------|--------------|--------------|-------------|--------------|-------------|-------------|-------------|-------------|-------------|-------------|-------------|-------------|-------------|-------------|-------------|-------------|-------------|-------------|-------------|-------------|-------------|
| (E)-nerolidol                   | 0.0         | 7.0          | 0.0          | 0.0         | 0.0          | 0.0         | 3.6         | 0.0         | 0.0         | 0.0         | 0.0         | 0.0         | 0.0         | 0.0         | 0.0         | 0.0         | 0.0         | 0.0         | 0.0         | 0.0         | 0.0         | 0.0         |
| (E)- $\beta$ -Damascenone       | 0.0         | 0.0          | 0.0          | 0.0         | 0.0          | 0.0         | 0.0         | 0.0         | 0.0         | 0.0         | 0.0         | 0.0         | 0.0         | 0.0         | 4.1         | 0.0         | 3.0         | 0.0         | 0.0         | 0.0         | 0.0         | 0.0         |
| (Z)-3-hexen-1-ol                | 0.0         | 0.0          | 0.0          | 0.0         | 0.0          | 5.7         | 0.0         | 0.0         | 0.0         | 0.0         | 0.0         | 0.0         | 0.0         | 0.0         | 0.0         | 0.0         | 0.0         | 0.0         | 0.0         | 0.0         | 0.0         | 0.0         |
| .tau.-Cadinol                   | 35.7        | 0.0          | 0.0          | 0.0         | 0.0          | 0.0         | 0.0         | 0.0         | 0.0         | 0.0         | 0.0         | 0.0         | 0.0         | 0.0         | 0.0         | 0.0         | 0.0         | 0.0         | 0.0         | 0.0         | 0.0         | 0.0         |
| 8-cedren-13-ol                  | 0.0         | 13.0         | 0.0          | 0.0         | 0.0          | 0.0         | 0.0         | 0.0         | 0.0         | 0.0         | 0.0         | 0.0         | 0.0         | 0.0         | 0.0         | 0.0         | 0.0         | 0.0         | 0.0         | 0.0         | 0.0         | 0.0         |
| Abieta-8,11,13-triene           | 0.0         | 0.0          | 0.0          | 7.1         | 0.0          | 0.0         | 0.0         | 0.0         | 0.0         | 0.0         | 0.0         | 0.0         | 0.0         | 0.0         | 0.0         | 0.0         | 0.0         | 0.0         | 0.0         | 0.0         | 0.0         | 0.0         |
| Abietadiene                     | 0.0         | 0.0          | 0.0          | 8.9         | 0.0          | 0.0         | 0.0         | 0.0         | 0.0         | 0.0         | 0.0         | 0.0         | 0.0         | 0.0         | 0.0         | 0.0         | 0.0         | 0.0         | 0.0         | 0.0         | 0.0         | 0.0         |
| Aromadendrene                   | 0.0         | 0.0          | 0.0          | 0.0         | 0.0          | 0.0         | 0.0         | 0.0         | 0.0         | 0.0         | 0.0         | 0.0         | 0.0         | 0.0         | 0.0         | 0.0         | 0.0         | 0.0         | 3.7         | 0.0         | 0.0         | 0.0         |
| Bicyclogermacrene               | 0.0         | 0.0          | 0.0          | 3.9         | 0.0          | 0.0         | 0.0         | 3.1         | 9.1         | 9.7         | 3.3         | 7.0         | 6.6         | 12.1        | 14.6        | 0.0         | 6.4         | 3.9         | 10.1        | 10.4        | 0.0         | 0.0         |
| Caryophyllene oxide             | 6.6         | 0.0          | 0.0          | 0.0         | 0.0          | 0.0         | 0.0         | 4.5         | 0.0         | 0.0         | 0.0         | 0.0         | 0.0         | 4.9         | 0.0         | 0.0         | 0.0         | 0.0         | 0.0         | 0.0         | 0.0         | 0.0         |
| cis-Cadina-1(6),4-diene         | 0.0         | 0.0          | 0.0          | 0.0         | 0.0          | 0.0         | 0.0         | 0.0         | 18.4        | 15.5        | 22.5        | 36.7        | 19.6        | 20.8        | 3.2         | 0.0         | 30.7        | 44.2        | 11.8        | 33.3        | 26.1        | 14.5        |
| cis-Sabinene                    | 0.0         | 0.0          | 0.0          | 5.5         | 0.0          | 0.0         | 0.0         | 0.0         | 0.0         | 0.0         | 0.0         | 0.0         | 0.0         | 0.0         | 0.0         | 0.0         | 0.0         | 0.0         | 0.0         | 0.0         | 0.0         | 0.0         |
| epi- $\alpha$ -Cadinol          | 0.0         | 0.0          | 0.0          | 0.0         | 0.0          | 0.0         | 0.0         | 0.0         | 0.0         | 0.0         | 0.0         | 0.0         | 0.0         | 0.0         | 0.0         | 0.0         | 4.0         | 0.0         | 0.0         | 0.0         | 0.0         | 0.0         |
| epi- $\alpha$ -Muurolol         | 0.0         | 0.0          | 0.0          | 0.0         | 0.0          | 0.0         | 0.0         | 0.0         | 0.0         | 0.0         | 0.0         | 0.0         | 0.0         | 0.0         | 0.0         | 0.0         | 0.0         | 0.0         | 0.0         | 0.0         | 0.0         | 3.8         |
| Germacrene B                    | 0.0         | 0.0          | 0.0          | 0.0         | 0.0          | 0.0         | 0.0         | 0.0         | 0.0         | 0.0         | 0.0         | 0.0         | 0.0         | 0.0         | 0.0         | 17.2        | 0.0         | 0.0         | 3.5         | 0.0         | 0.0         | 0.0         |
| germacrene D                    | 0.0         | 0.0          | 7.3          | 0.0         | 0.0          | 0.0         | 6.1         | 0.0         | 0.0         | 0.0         | 0.0         | 0.0         | 0.0         | 0.0         | 27.8        | 40.8        | 0.0         | 0.0         | 0.0         | 14.5        | 6.8         | 12.5        |
| guaiol                          | 0.0         | 6.2          | 0.0          | 0.0         | 0.0          | 0.0         | 0.0         | 0.0         | 0.0         | 0.0         | 0.0         | 0.0         | 0.0         | 0.0         | 0.0         | 0.0         | 0.0         | 0.0         | 0.0         | 0.0         | 0.0         | 0.0         |
| Isodaucene                      | 0.0         | 0.0          | 0.0          | 0.0         | 0.0          | 0.0         | 0.0         | 0.0         | 11.4        | 3.6         | 0.0         | 0.0         | 0.0         | 0.0         | 0.0         | 0.0         | 0.0         | 0.0         | 0.0         | 0.0         | 0.0         | 0.0         |
| limonene                        | 0.0         | 6.1          | 0.0          | 0.0         | 0.0          | 0.0         | 0.0         | 0.0         | 0.0         | 0.0         | 0.0         | 0.0         | 0.0         | 0.0         | 0.0         | 0.0         | 0.0         | 0.0         | 0.0         | 0.0         | 0.0         | 0.0         |
| palmitic acid                   | 0.0         | 0.0          | 0.0          | 0.0         | 0.0          | 11.0        | 0.0         | 0.0         | 0.0         | 0.0         | 0.0         | 0.0         | 0.0         | 0.0         | 0.0         | 0.0         | 0.0         | 0.0         | 0.0         | 0.0         | 0.0         | 0.0         |
| Palustrol                       | 0.0         | 0.0          | 0.0          | 0.0         | 0.0          | 0.0         | 0.0         | 0.0         | 0.0         | 0.0         | 4.9         | 0.0         | 0.0         | 0.0         | 0.0         | 0.0         | 0.0         | 0.0         | 0.0         | 0.0         | 0.0         | 0.0         |
| Pentadecanal                    | 0.0         | 0.0          | 0.0          | 0.0         | 0.0          | 0.0         | 3.3         | 0.0         | 0.0         | 0.0         | 0.0         | 0.0         | 0.0         | 0.0         | 0.0         | 0.0         | 0.0         | 0.0         | 0.0         | 0.0         | 0.0         | 0.0         |
| phytol                          | 0.0         | 0.0          | 5.8          | 0.0         | 0.0          | 37.1        | 35.5        | 0.0         | 0.0         | 0.0         | 0.0         | 0.0         | 0.0         | 0.0         | 0.0         | 0.0         | 0.0         | 0.0         | 0.0         | 0.0         | 0.0         | 0.0         |
| seychellene                     | 0.0         | 0.0          | 0.0          | 0.0         | 11.2         | 0.0         | 0.0         | 0.0         | 0.0         | 0.0         | 0.0         | 0.0         | 0.0         | 0.0         | 0.0         | 0.0         | 0.0         | 0.0         | 0.0         | 0.0         | 0.0         | 0.0         |
| spathulenol                     | 8.1         | 0.0          | 0.0          | 5.3         | 0.0          | 0.0         | 0.0         | 0.0         | 0.0         | 0.0         | 0.0         | 0.0         | 0.0         | 0.0         | 0.0         | 0.0         | 0.0         | 0.0         | 0.0         | 0.0         | 0.0         | 0.0         |
| trans-(Z)- $\alpha$ -bergamotol | 0.0         | 0.0          | 0.0          | 6.0         | 0.0          | 0.0         | 0.0         | 0.0         | 0.0         | 0.0         | 0.0         | 0.0         | 0.0         | 0.0         | 0.0         | 0.0         | 0.0         | 0.0         | 0.0         | 0.0         | 0.0         | 0.0         |
| $\alpha$ -bulnesene             | 0.0         | 0.0          | 0.0          | 0.0         | 23.8         | 0.0         | 0.0         | 0.0         | 0.0         | 0.0         | 0.0         | 0.0         | 0.0         | 0.0         | 0.0         | 0.0         | 0.0         | 0.0         | 0.0         | 0.0         | 0.0         | 0.0         |
| $\alpha$ -Cadinol               | 26.8        | 6.2          | 0.0          | 0.0         | 0.0          | 0.0         | 0.0         | 0.0         | 0.0         | 0.0         | 0.0         | 0.0         | 0.0         | 0.0         | 0.0         | 4.2         | 4.0         | 0.0         | 0.0         | 0.0         | 0.0         | 0.0         |
| $\alpha$ -copaene               | 0.0         | 0.0          | 8.0          | 0.0         | 0.0          | 0.0         | 0.0         | 0.0         | 0.0         | 0.0         | 0.0         | 0.0         | 0.0         | 0.0         | 0.0         | 0.0         | 7.0         | 6.4         | 0.0         | 0.0         | 0.0         | 0.0         |
| $\alpha$ -Eudesmol              | 0.0         | 0.0          | 0.0          | 0.0         | 0.0          | 0.0         | 0.0         | 0.0         | 0.0         | 0.0         | 0.0         | 0.0         | 0.0         | 0.0         | 0.0         | 0.0         | 0.0         | 3.2         | 0.0         | 0.0         | 0.0         | 0.0         |

|                            |     |     |      |     |      |     |      |      |      |      |      |      |      |      |     |      |     |     |      |      |      |      |
|----------------------------|-----|-----|------|-----|------|-----|------|------|------|------|------|------|------|------|-----|------|-----|-----|------|------|------|------|
| $\alpha$ -guaiane          | 0.0 | 0.0 | 0.0  | 0.0 | 8.3  | 0.0 | 0.0  | 0.0  | 0.0  | 0.0  | 0.0  | 0.0  | 0.0  | 0.0  | 0.0 | 0.0  | 0.0 | 0.0 | 0.0  | 0.0  | 0.0  | 0.0  |
| $\alpha$ -Himachalene      | 0.0 | 0.0 | 0.0  | 0.0 | 0.0  | 0.0 | 0.0  | 0.0  | 0.0  | 0.0  | 0.0  | 0.0  | 0.0  | 0.0  | 0.0 | 0.0  | 0.0 | 0.0 | 0.0  | 4.1  | 4.1  |      |
| $\alpha$ -humulene         | 0.0 | 0.0 | 5.4  | 0.0 | 13.7 | 0.0 | 0.0  | 8.0  | 0.0  | 0.0  | 0.0  | 0.0  | 0.0  | 4.2  | 0.0 | 0.0  | 0.0 | 0.0 | 0.0  | 0.0  | 0.0  |      |
| $\beta$ -Caryophyllene     | 0.0 | 0.0 | 36.6 | 8.8 | 7.1  | 0.0 | 19.9 | 36.7 | 29.5 | 27.6 | 42.1 | 36.5 | 24.7 | 21.3 | 9.3 | 13.1 | 0.0 | 0.0 | 13.9 | 9.7  | 21.1 | 17.4 |
| $\beta$ -Cubebene          | 0.0 | 0.0 | 0.0  | 0.0 | 0.0  | 0.0 | 0.0  | 0.0  | 0.0  | 0.0  | 0.0  | 0.0  | 0.0  | 3.2  | 0.0 | 0.0  | 0.0 | 0.0 | 0.0  | 0.0  | 0.0  |      |
| $\beta$ -Duprezianene      | 0.0 | 0.0 | 0.0  | 0.0 | 0.0  | 0.0 | 0.0  | 0.0  | 0.0  | 0.0  | 0.0  | 0.0  | 0.0  | 0.0  | 0.0 | 0.0  | 0.0 | 0.0 | 3.9  | 0.0  | 0.0  |      |
| $\beta$ -Elemene           | 0.0 | 0.0 | 0.0  | 0.0 | 0.0  | 0.0 | 0.0  | 20.5 | 0.0  | 0.0  | 0.0  | 0.0  | 0.0  | 0.0  | 0.0 | 0.0  | 0.0 | 0.0 | 17.4 | 15.2 | 0.0  |      |
| $\beta$ -Himachalene oxide | 0.0 | 0.0 | 0.0  | 0.0 | 0.0  | 0.0 | 0.0  | 0.0  | 0.0  | 0.0  | 0.0  | 0.0  | 0.0  | 0.0  | 0.0 | 0.0  | 0.0 | 3.2 | 0.0  | 0.0  | 0.0  |      |
| $\beta$ -Panasinsene       | 0.0 | 0.0 | 0.0  | 0.0 | 0.0  | 0.0 | 0.0  | 0.0  | 0.0  | 0.0  | 0.0  | 0.0  | 5.8  | 0.0  | 0.0 | 0.0  | 0.0 | 0.0 | 0.0  | 0.0  | 8.8  |      |
| $\beta$ -Selinene          | 0.0 | 0.0 | 0.0  | 0.0 | 0.0  | 0.0 | 0.0  | 0.0  | 0.0  | 6.5  | 0.0  | 0.0  | 0.0  | 0.0  | 3.4 | 0.0  | 0.0 | 0.0 | 0.0  | 0.0  | 3.7  |      |
| $\beta$ -Vetivenene        | 0.0 | 0.0 | 0.0  | 0.0 | 0.0  | 0.0 | 0.0  | 0.0  | 3.3  | 0.0  | 0.0  | 0.0  | 0.0  | 0.0  | 0.0 | 0.0  | 0.0 | 0.0 | 0.0  | 0.0  | 0.0  |      |
| $\gamma$ -Eudesmol         | 0.0 | 0.0 | 0.0  | 0.0 | 0.0  | 0.0 | 0.0  | 0.0  | 0.0  | 0.0  | 0.0  | 0.0  | 0.0  | 0.0  | 0.0 | 0.0  | 0.0 | 3.0 | 0.0  | 0.0  | 0.0  |      |
| $\gamma$ -Muurolene        | 0.0 | 0.0 | 0.0  | 0.0 | 0.0  | 0.0 | 0.0  | 0.0  | 0.0  | 3.2  | 0.0  | 0.0  | 0.0  | 0.0  | 0.0 | 0.0  | 5.1 | 0.0 | 8.5  | 0.0  | 0.0  |      |
| $\gamma$ -Patchoulene      | 0.0 | 0.0 | 0.0  | 0.0 | 0.0  | 0.0 | 0.0  | 0.0  | 3.1  | 0.0  | 0.0  | 0.0  | 0.0  | 0.0  | 0.0 | 0.0  | 0.0 | 0.0 | 0.0  | 0.0  | 0.0  |      |
| $\gamma$ -terpinene        | 0.0 | 0.0 | 0.0  | 0.0 | 4.2  | 0.0 | 0.0  | 0.0  | 0.0  | 0.0  | 0.0  | 0.0  | 0.0  | 0.0  | 0.0 | 0.0  | 0.0 | 0.0 | 0.0  | 0.0  | 0.0  |      |
| $\delta$ -cadinene         | 0.0 | 0.0 | 5.7  | 0.0 | 0.0  | 0.0 | 0.0  | 0.0  | 0.0  | 0.0  | 0.0  | 0.0  | 5.3  | 8.9  | 0.0 | 0.0  | 0.0 | 0.0 | 0.0  | 0.0  | 10.1 |      |
